# Supplementary material
Source: publisher figshare collection journal article supplement (https://acs.figshare.com/ndownloader/files/23441000)
Supplement: Supplementary file 1 [file 23441000]

# **Supplementary Information For**

## **Optical Potential-Well Array for High-Selectivity, Massive Trapping and Sorting at Nanoscale**

Yuzhi Shi<sup>1</sup>, Haitao Zhao<sup>1</sup>, Lip Ket Chin<sup>1</sup>, Yi Zhang<sup>2</sup>, Peng Huat Yap<sup>3</sup>, Wee Ser<sup>1</sup>,  
Cheng-Wei Qiu<sup>4\*</sup> and Ai Qun Liu<sup>1\*</sup>

<sup>1</sup> *School of Electrical and Electronic Engineering, Nanyang Technological University,  
Singapore 639798*

<sup>2</sup> *School of Mechanical and Aerospace Engineering, Nanyang Technological  
University Singapore 639798*

<sup>3</sup> *Lee Kong Chian School of Medicine, Nanyang Technological University, Singapore  
308232*

<sup>4</sup> *Department of Electrical and Computer Engineering, National University of  
Singapore, Singapore 117583*

*\*Corresponding Author: [chengwei.qiu@nus.edu.sg](mailto:chengwei.qiu@nus.edu.sg); [eaqliu@ntu.edu.sg](mailto:eaqliu@ntu.edu.sg)*

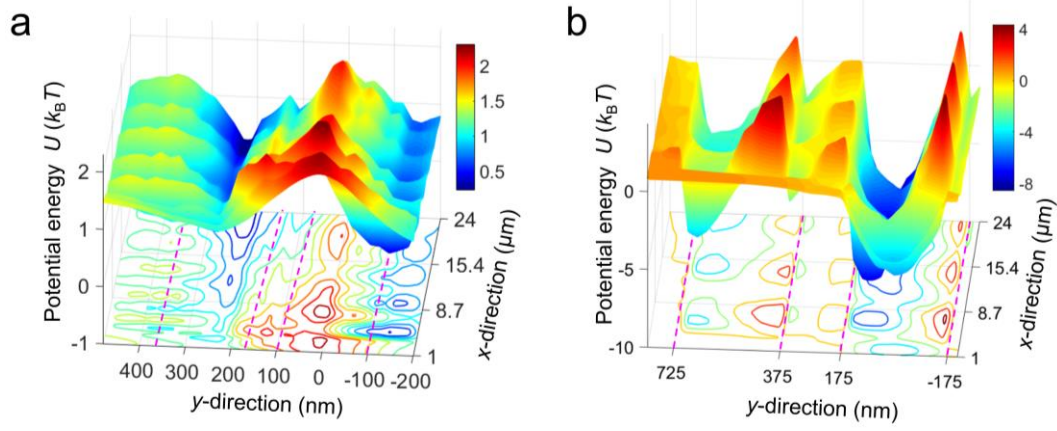

Fig. S1. Potential wells of the 200 nm nanoparticle (a) in a slot waveguide under TE mode excitation.  $W = 100$  nm;  $G = 60$  nm; (b) in a nanowavguide pair under TM mode excitation.  $W = 350$  nm;  $G = 200$  nm.

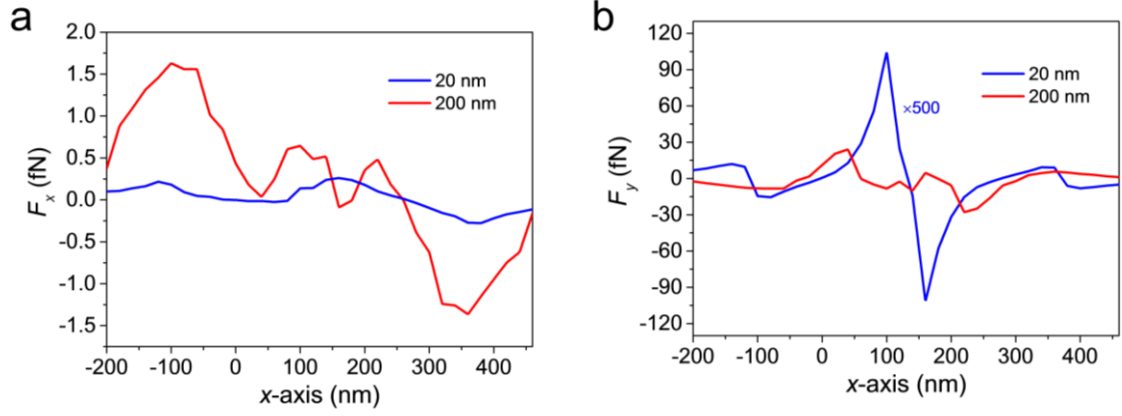

Fig. S2. Optical forces on the 20 and 200 nm nanoparticles. (a)  $F_x$  and (b)  $F_y$  along the  $y$ -direction in the slot waveguide at  $x = 7 \mu\text{m}$ . The force profiles on the 20 nm nanoparticle resemble those of a nanoparticle in a gaussian beam.

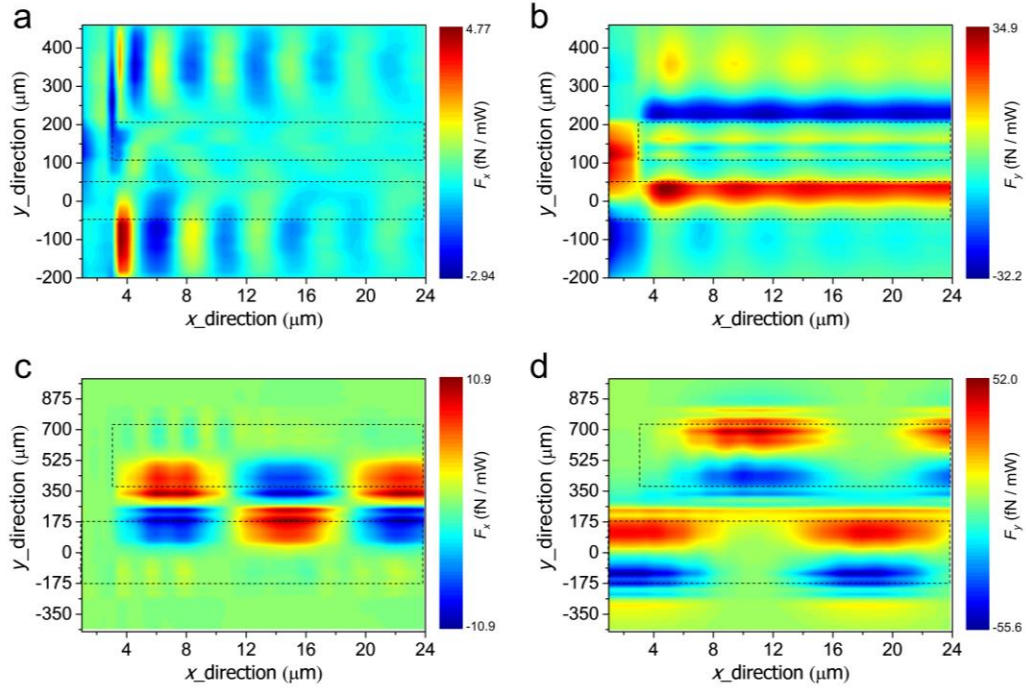

Fig. S3. Optical forces on the 200 nm nanoparticles. (a)  $F_x$  and (b)  $F_y$  in the slot waveguide with  $W = 100$  nm and  $G = 60$  nm. (c)  $F_x$  and (d)  $F_y$  in the nanowaveguide pair with  $W = 350$  nm and  $G = 200$  nm.

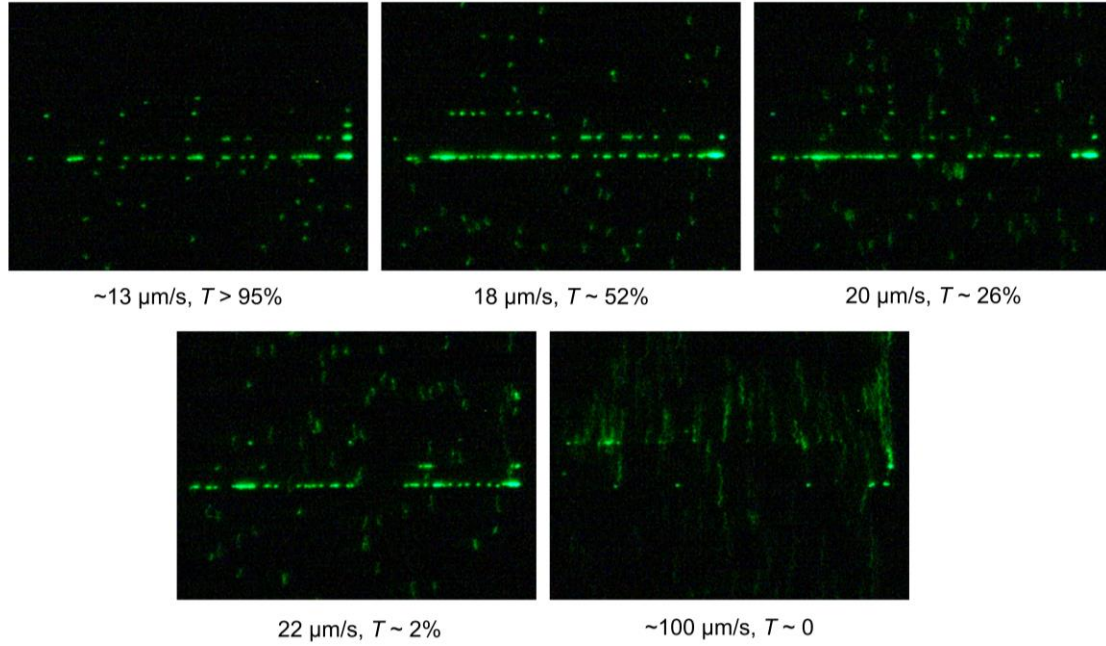

Fig. S4. Images of trapping 200 nm fluorescence nanoparticles under different flow velocities. (a) Trapping efficiency  $T > 95\%$  when the flow velocity  $v = 13 \mu\text{m/s}$ ;  $T = 52\%$  when  $v = 18 \mu\text{m/s}$ ;  $T = 26\%$  when  $v = 20 \mu\text{m/s}$ ;  $T = 2\%$  when  $v = 22 \mu\text{m/s}$ ;  $T = 0$  when  $v = 100 \mu\text{m/s}$ . The laser power used was 1.2 mW.
